# Supplementary material
Source: MDPI journal article supplement (https://www.mdpi.com/1999-4907/12/12/1787)
Supplement: s1 [file s1]

## Article

# Short-Term Effects of Cover Grass on Soil Microbial Communities in an Apple Orchard on the Loess Plateau

Pan Wan \* and Ruirui He

College of Forestry, Northwest A&F University, Yangling 712100, China; hrr19911223@163.com

\* Correspondence: wp7413841@nwsuaf.edu.cn

**Citation:** Wan, P.; He, R. Short-Term Effects of Cover Grass on Soil Microbial Communities in an Apple Orchard on the Loess Plateau. *Forests* **2021**, *12*, 1787. <https://doi.org/10.3390/f12121787>

Academic Editor: Hui Li and Yuguang Zhang

Received: 17 November 2021

Accepted: 14 December 2021

Published: 16 December 2021

**Publisher's Note:** MDPI stays neutral with regard to jurisdictional claims in published maps and institutional affiliations.

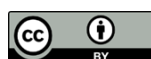

**Copyright:** © 2021 by the authors. Submitted for possible open access publication under the terms and conditions of the Creative Commons Attribution (CC BY) license (<https://creativecommons.org/licenses/by/4.0/>).

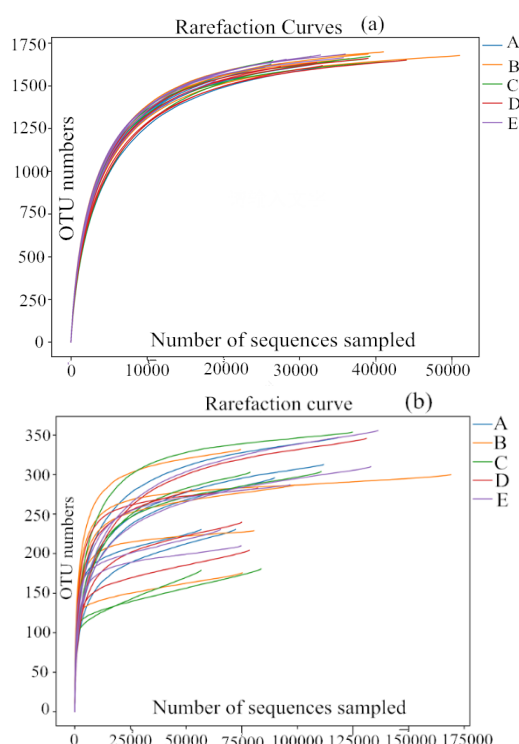

**Figure S1.** Rarefaction curves of the bacterial(a) and fungal(b).

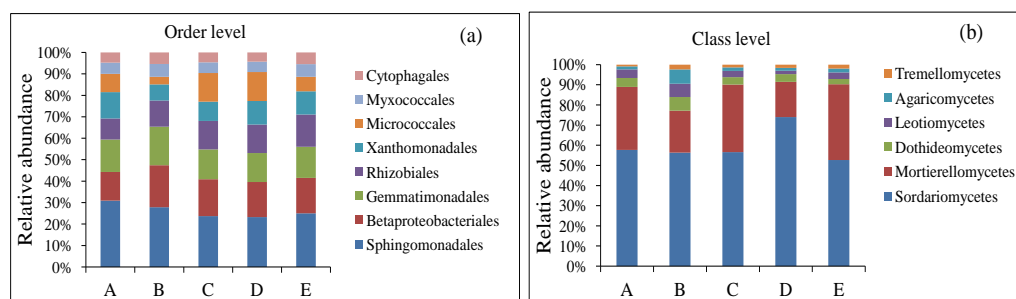

**Figure S2** Relative abundance of the dominant groups of the bacterial (a) at the order level and fungal (b) communities at the class level among the different treatments. A indicates 0% (CK), B indicates 20% (LIC), C indicates 40% (MIC1), D indicates 60% (MIC2), and E indicates 80% (HIC).

**Table S1.** Quality assessment of bacterial sequencing data.

| Sample | PE Reads | Raw Tags | Clean Tags | Effective Tags | AvgLen(bp) | GC(%) | Q20(%) | Q30(%) | Effective(%) |
|--------|----------|----------|------------|----------------|------------|-------|--------|--------|--------------|
| A1     | 80031    | 75807    | 67699      | 62504          | 417        | 56.57 | 95.68  | 91.64  | 78.1         |
| A2     | 60884    | 57545    | 51286      | 47484          | 418        | 56.93 | 95.72  | 91.69  | 77.99        |
| A3     | 69531    | 65497    | 58271      | 54822          | 417        | 56.76 | 95.7   | 91.67  | 78.85        |
| A4     | 67181    | 63497    | 56511      | 51776          | 418        | 56.52 | 95.66  | 91.62  | 77.07        |
| A5     | 55733    | 52293    | 46062      | 44020          | 419        | 57.12 | 95.61  | 91.49  | 78.98        |
| B1     | 68306    | 64130    | 56122      | 55210          | 419        | 57.25 | 95.52  | 91.31  | 80.83        |
| B2     | 83075    | 78587    | 69603      | 66483          | 419        | 57.54 | 95.73  | 91.66  | 80.03        |
| B3     | 109545   | 104424   | 94569      | 89370          | 417        | 56.98 | 96.02  | 92.2   | 81.58        |
| B4     | 79977    | 76712    | 70404      | 66711          | 417        | 57.05 | 96.13  | 92.43  | 83.41        |
| B5     | 87144    | 83659    | 76553      | 72780          | 418        | 57.14 | 96.19  | 92.51  | 83.52        |
| C1     | 60173    | 57462    | 52468      | 48023          | 418        | 56.74 | 96.14  | 92.44  | 79.81        |
| C2     | 67504    | 64298    | 58607      | 58019          | 419        | 57.14 | 96.2   | 92.53  | 85.95        |
| C3     | 59599    | 56926    | 51805      | 51081          | 419        | 57.09 | 96.15  | 92.45  | 85.71        |
| C4     | 76863    | 73634    | 67703      | 62011          | 417        | 56.43 | 96.22  | 92.58  | 80.68        |
| C5     | 77157    | 73892    | 67214      | 61865          | 419        | 56.83 | 96.09  | 92.34  | 80.18        |
| D1     | 68639    | 65307    | 59572      | 57794          | 418        | 56.28 | 96.14  | 92.45  | 84.2         |
| D2     | 79922    | 73990    | 61826      | 56175          | 418        | 56.72 | 94.83  | 90.13  | 70.29        |
| D3     | 71997    | 66629    | 56915      | 53778          | 417        | 56.73 | 95.02  | 90.45  | 74.69        |
| D4     | 79850    | 73507    | 60759      | 57819          | 418        | 57.17 | 94.82  | 90.1   | 72.41        |
| D5     | 79917    | 73629    | 60994      | 59355          | 419        | 57.26 | 94.88  | 90.21  | 74.27        |
| E1     | 80165    | 73873    | 61255      | 59613          | 418        | 57.22 | 94.87  | 90.19  | 74.36        |
| E2     | 80146    | 73839    | 61103      | 57401          | 418        | 57.18 | 94.8   | 90.05  | 71.62        |
| E3     | 79864    | 73535    | 60538      | 57868          | 418        | 56.84 | 94.76  | 90     | 72.46        |
| E4     | 53739    | 49442    | 40842      | 38460          | 418        | 56.75 | 94.84  | 90.17  | 71.57        |
| E5     | 79872    | 76808    | 70591      | 64473          | 419        | 56.98 | 96.2   | 92.54  | 80.72        |

A indicates 0% (NC), B indicates 20% (LIC), C indicates 40% (MIC<sub>1</sub>), D indicates 60% (MIC<sub>2</sub>), and E indicates 80% (HIC).

Table S2. Quality assessment of fungal sequencing data.

| Sample | PE Reads | Raw Tags | Clean Tags | Effective Tags | AvgLen(bp) | GC(%) | Q20(%) | Q30(%) | Effective(%) |
|--------|----------|----------|------------|----------------|------------|-------|--------|--------|--------------|
| A1     | 132613   | 122568   | 121858     | 121858         | 253        | 46.64 | 99.49  | 98.67  | 91.89        |
| A2     | 97934    | 92678    | 92009      | 92009          | 236        | 45.79 | 99.71  | 99.05  | 93.95        |
| A3     | 79448    | 74780    | 74215      | 74215          | 229        | 44.55 | 99.73  | 99.11  | 93.41        |
| A4     | 129280   | 121444   | 120762     | 120762         | 240        | 44.47 | 99.68  | 99.01  | 93.41        |
| A5     | 64958    | 60468    | 59886      | 59886          | 243        | 47.45 | 99.62  | 98.88  | 92.19        |
| B1     | 85625    | 78498    | 77953      | 77953          | 263        | 48.89 | 99.44  | 98.55  | 91.04        |
| B2     | 85220    | 78997    | 78758      | 78758          | 252        | 47.26 | 99.52  | 98.71  | 92.42        |
| B3     | 89986    | 84053    | 83779      | 83779          | 247        | 49.07 | 99.6   | 98.84  | 93.1         |
| B4     | 188731   | 176136   | 175367     | 175367         | 252        | 45.13 | 99.38  | 98.5   | 92.92        |
| B5     | 109733   | 102794   | 102108     | 102108         | 254        | 45.61 | 99.56  | 98.78  | 93.05        |
| C1     | 138173   | 128150   | 127546     | 127546         | 240        | 47.54 | 99.65  | 98.91  | 92.31        |
| C2     | 92866    | 86390    | 85704      | 85704          | 240        | 45.71 | 99.64  | 98.91  | 92.29        |
| C3     | 63612    | 59806    | 59219      | 59219          | 243        | 48.46 | 99.62  | 98.86  | 93.09        |
| C4     | 119955   | 113472   | 112866     | 112866         | 231        | 42.88 | 99.69  | 99.03  | 94.09        |
| C5     | 87763    | 82172    | 81856      | 81856          | 242        | 43.87 | 99.6   | 98.84  | 93.27        |
| D1     | 60501    | 55832    | 55454      | 55454          | 235        | 47.22 | 99.67  | 98.96  | 91.66        |
| D2     | 142689   | 134090   | 133434     | 133434         | 236        | 46.45 | 99.72  | 99.07  | 93.51        |
| D3     | 82086    | 77493    | 76879      | 76879          | 236        | 48.77 | 99.7   | 99.02  | 93.66        |
| D4     | 91140    | 85376    | 84857      | 84857          | 240        | 47.5  | 99.66  | 98.94  | 93.11        |
| D5     | 86079    | 81575    | 81042      | 81042          | 239        | 47.78 | 99.69  | 99.01  | 94.15        |
| E1     | 72512    | 68401    | 67961      | 67961          | 242        | 44.33 | 99.63  | 98.92  | 93.72        |
| E2     | 143627   | 136018   | 135367     | 135367         | 235        | 45.47 | 99.71  | 99.05  | 94.25        |
| E3     | 81849    | 76926    | 76647      | 76647          | 240        | 44.71 | 99.62  | 98.89  | 93.64        |
| E4     | 104916   | 98903    | 98572      | 98572          | 234        | 45.26 | 99.64  | 98.95  | 93.95        |
| E5     | 147781   | 139423   | 138758     | 138758         | 239        | 48.57 | 99.69  | 99.01  | 93.89        |

A indicates 0% (NC), B indicates 20% (LIC), C indicates 40% (MIC<sub>1</sub>), D indicates 60% (MIC<sub>2</sub>), and E indicates 80% (HIC).

**Table S3.** Composition of bacterial community at the phylum level.

| Phylum                  | A            | B           | C            | D            | E            |
|-------------------------|--------------|-------------|--------------|--------------|--------------|
| <i>Proteobacteria</i>   | 42.44±3.13a  | 38.62±3.18b | 41.19±1.50ab | 41.79±3.89ab | 40.18±1.57ab |
| <i>Acidobacteria</i>    | 13.27±2.26a  | 16.06±1.76a | 14.42±3.09a  | 14.08±3.02a  | 16.40±1.71a  |
| <i>Actinobacteria</i>   | 11.69±1.09ab | 10.03±1.11a | 13.84±4.89bc | 14.29±1.06b  | 11.01±1.57ac |
| <i>Chloroflexi</i>      | 9.24±0.78ac  | 12.36±1.39b | 9.17±1.21a   | 9.39±0.85ac  | 10.54±0.73cd |
| <i>Gemmatimonadetes</i> | 9.12±0.69a   | 8.83±0.64ab | 7.81±1.64ab  | 7.32±1.54b   | 7.26±1.14b   |
| <i>Bacteroidetes</i>    | 5.65±0.79a   | 4.47±0.29b  | 4.75±0.39b   | 4.46±0.72b   | 4.97±0.71ab  |
| <i>Planctomycetes</i>   | 1.93±0.32a   | 2.30±0.41a  | 1.74±0.57a   | 1.70±0.58a   | 2.20±0.33a   |
| <i>Rokubacteria</i>     | 1.49±0.73a   | 1.88±0.80a  | 1.80±0.58a   | 1.81±0.87a   | 1.90±0.68a   |
| <i>Nitrospirae</i>      | 1.12±0.13a   | 1.46±0.17ab | 1.25±0.25a   | 1.32±0.36a   | 1.79±0.41b   |
| <i>Verrucomicrobia</i>  | 1.30±0.16a   | 1.52±0.24a  | 1.43±0.33a   | 1.29±0.12a   | 1.35±0.19a   |

The values in the table are mean values (± SD, n =5). Significant differences among different vegetation types are indicated by different letters at the 0.05 level. A indicates 0% (NC), B indicates 20% (LIC), C indicates 40% (MIC<sub>1</sub>), D indicates 60% (MIC<sub>2</sub>), and E indicates 80% (HIC).

**Table S4.** Composition of bacterial community at the orders level.

| Bacteria orders              | A           | B           | C           | D          | E            |
|------------------------------|-------------|-------------|-------------|------------|--------------|
| <i>Sphingomonadales</i>      | 13.89±2.13b | 10.26±2.43a | 9.96±1.68a  | 9.46±2.18a | 9.77±0.64a   |
| <i>Betaproteobacteriales</i> | 5.97±0.88a  | 7.22±1.18a  | 7.24±1.19a  | 6.68±1.07a | 6.44±0.74a   |
| <i>Gemmatimonadales</i>      | 6.79±0.51a  | 6.64±0.31a  | 5.83±1.01a  | 5.49±0.87a | 5.66±0.74a   |
| <i>Rhizobiales</i>           | 4.41±1.13a  | 4.50±1.18a  | 5.57±0.28a  | 5.40±0.59a | 5.86±0.81a   |
| <i>Xanthomonadales</i>       | 5.51±1.36a  | 2.77±1.25a  | 3.79±0.74a  | 4.47±2.73a | 4.23±2.72a   |
| <i>Micrococcales</i>         | 3.8±1.32ac  | 1.31±0.58a  | 5.60±0.52bc | 5.53±1.50c | 2.64±1.24abc |
| <i>Myxococcales</i>          | 2.35±0.35a  | 2.21±0.55a  | 2.11±0.39a  | 1.96±0.46a | 2.30±0.41a   |
| <i>Cytophagales</i>          | 2.14±0.43a  | 1.97±0.19a  | 1.94±0.20a  | 1.75±0.59a | 2.13±0.57a   |

The values in the table are mean values (± SD, n =5). Significant differences among different vegetation types are indicated by different letters at the 0.05 level. A indicates 0% (NC), B indicates 20% (LIC), C indicates 40% (MIC<sub>1</sub>), D indicates 60% (MIC<sub>2</sub>), and E indicates 80% (HIC).

**Table S5.** Composition of fungi community at the phylum level.

| Phylum                   | A             | B             | C             | D            | E            |
|--------------------------|---------------|---------------|---------------|--------------|--------------|
| <i>Ascomycota</i>        | 59.58±10.68ab | 58.56±9.96ab  | 58.80±16.23ab | 74.14±6.64a  | 53.59±13.99b |
| <i>Mortierellomycota</i> | 27.09±5.94abc | 17.02±11.37ab | 29.83±17.03bc | 15.98±8.11ab | 34.00±11.80c |
| <i>Basidiomycota</i>     | 2.10±1.51a    | 4.23±3.74a    | 2.89±2.36a    | 2.83±1.69a   | 3.51±1.79a   |

The values in the table are mean values (± SD, n =5). Significant differences among different vegetation types are indicated by different letters at the 0.05 level. A indicates 0% (NC), B indicates 20% (LIC), C indicates 40% (MIC<sub>1</sub>), D indicates 60% (MIC<sub>2</sub>), and E indicates 80% (HIC).

**Table S6.** Compositions of fungi community at the classes level.

| Fungi classes             | A            | B            | C             | D           | E             |
|---------------------------|--------------|--------------|---------------|-------------|---------------|
| <i>Sordariomycetes</i>    | 49.87±10.77a | 44.75±8.61a  | 50.35±15.19a  | 67.6±7.77a  | 47.13±16.59a  |
| <i>Mortierellomycetes</i> | 27.07±5.98ab | 16.53±11.06a | 29.83±17.03ab | 15.94±8.08a | 33.73±11.79bc |
| <i>Dothideomycetes</i>    | 3.82±3.27a   | 5.41±3.51a   | 3.28±0.98a    | 3.51±3.11a  | 2.33±0.68a    |
| <i>Leotiomycetes</i>      | 3.65±3.25a   | 5.23±3.08a   | 2.69±1.00a    | 1.48±0.63a  | 2.89±1.81a    |
| <i>Agaricomycetes</i>     | 1.30±0.56a   | 5.65±3.22a   | 1.56±1.18a    | 1.33±0.59a  | 1.73±0.89a    |
| <i>Tremellomycetes</i>    | 0.76±0.34a   | 1.87±0.91a   | 1.24±1.08a    | 1.46±0.88a  | 1.74±1.27a    |

The values in the table are mean values (± SD, n =5). Significant differences among different vegetation types are indicated by different letters at the 0.05 level. A indicates 0% (NC), B indicates 20% (LIC), C indicates 40% (MIC<sub>1</sub>), D indicates 60% (MIC<sub>2</sub>), and E indicates 80% (HIC).
